# Supplementary material
Source: ML conference proceedings conference paper supplement (https://proceedings.neurips.cc/paper_files/paper/2016/hash/99c5e07b4d5de9d18c350cdf64c5aa3d-Abstract.html)
Supplement: Supplementary file [file 99c5e07b4d5de9d18c350cdf64c5aa3d-Supplemental.zip]

## Supplementary Material

In this extra material, we provide the details about the derivation of the tight variational evidence lower bound of our proposed GP factorization model (Section 1) as well as its gradient calculation (Section 2). Moreover, we give the convergence proof of the fixed point iteration used in our distributed inference algorithm for binary tensor (Section 3). Finally, we show the experimental results of our model's application on real-world click-through-rate prediction problem (Section 4).

### 1 Tight Variational Evidence Lower Bound

The naive variational evidence lower bound (ELBO) derived from the sparse Gaussian process framework (see Section 4.1 of the main paper) is given by

$$L_1(\mathcal{U}, \mathbf{B}, q(\mathbf{v})) = \log(p(\mathcal{U})) + \int q(\mathbf{v}) \log \frac{p(\mathbf{v}|\mathbf{B})}{q(\mathbf{v})} d\mathbf{v} + \sum_j \int q(\mathbf{v}) F_{\mathbf{v}}(y_{i_j}, \beta) d\mathbf{v} \quad (1)$$

for continuous tensor and

$$\begin{aligned} L_2(\mathcal{U}, \mathbf{B}, q(\mathbf{v}), q(\mathbf{z})) &= \log(p(\mathcal{U})) + \int q(\mathbf{v}) \log \left( \frac{p(\mathbf{v}|\mathbf{B})}{q(\mathbf{v})} \right) d\mathbf{v} + \sum_j q(z_j) \log \left( \frac{p(y_{i_j}|z_j)}{q(z_j)} \right) \\ &+ \sum_j \int q(\mathbf{v}) \int q(z_j) F_{\mathbf{v}}(z_j, 1) dz_j d\mathbf{v} \end{aligned} \quad (2)$$

for binary tensor, where  $F_{\mathbf{v}}(\cdot, *) = \int \log(\mathcal{N}(\cdot | m_{i_j}, *)) \mathcal{N}(m_{i_j} | \mu_j, \sigma_j^2) dm_{i_j}$  and  $p(\mathbf{v}|\mathbf{B}) = \mathcal{N}(\mathbf{v} | \mathbf{0}, K_{BB})$ . Our goal is to further obtain a tight ELBO that subsumes the optimal variational posterior (i.e.,  $q(\mathbf{v})$  and  $q(\mathbf{z})$ ) so as to prevent the sequential E-M procedure for efficient parallel training and to improve the inference quality.

#### 1.1 Continuous Tensor

First, let us consider the continuous data. Given  $\mathcal{U}$  and  $\mathbf{B}$ , we use functional derivatives (Bishop, 2006) to calculate the optimal  $q(\mathbf{v})$ . The functional derivative of  $L_1$  with respect to  $q(\mathbf{v})$  is given by

$$\frac{\delta L_1(q)}{\delta q(\mathbf{v})} = \log \frac{p(\mathbf{v}|\mathbf{B})}{q(\mathbf{v})} - 1 + \sum_j F_{\mathbf{v}}(y_{i_j}, \beta).$$

Because  $q(\mathbf{v})$  is a probability density function, we use Lagrange multipliers to impose the constraint and obtain the optimal  $q(\mathbf{v})$  by solving

$$\begin{aligned} \frac{\delta(L_1(q) + \lambda(\int q(\mathbf{v}) d\mathbf{v} - 1))}{\delta q(\mathbf{v})} &= 0, \\ \frac{\partial(L_1(q) + \lambda(\int q(\mathbf{v}) d\mathbf{v} - 1))}{\partial \lambda} &= 0. \end{aligned}$$

Though simple algebraic manipulations, we can obtain the optimal  $q(\mathbf{v})$  to be the following form

$$q^*(\mathbf{v}) = \mathcal{N}(\mathbf{v} | \boldsymbol{\mu}, \boldsymbol{\Lambda}),$$

where  $\boldsymbol{\mu} = \beta \mathbf{K}_{BB}(\mathbf{K}_{BB} + \beta \mathbf{K}_{BS} \mathbf{K}_{SB})^{-1} \mathbf{K}_{BS} \mathbf{y}$  and  $\boldsymbol{\Lambda} = \mathbf{K}_{BB}(\mathbf{K}_{BB} + \beta \mathbf{K}_{BS} \mathbf{K}_{SB})^{-1} \mathbf{K}_{BB}$ . Now substituting  $q(\mathbf{v})$  in  $L_1$  with  $\mathcal{N}(\mathbf{v} | \boldsymbol{\mu}, \boldsymbol{\Lambda})$ , we obtain the tight ELBO presented in **Theorem 4.1** of the main paper:

$$\begin{aligned} \log(p(\mathbf{y}, \mathcal{U} | \mathbf{B})) &\geq L_1^*(\mathcal{U}, \mathbf{B}) = \frac{1}{2} \log |\mathbf{K}_{BB}| - \frac{1}{2} \log |\mathbf{K}_{BB} + \beta \mathbf{A}_1| - \frac{1}{2} \beta a_2 - \frac{1}{2} \beta a_3 \\ &+ \frac{\beta}{2} \text{tr}(\mathbf{K}_{BB}^{-1} \mathbf{A}_1) - \frac{1}{2} \sum_{k=1}^K \|\mathbf{U}^{(k)}\|_F^2 + \frac{1}{2} \beta^2 \mathbf{a}_4^\top (\mathbf{K}_{BB} + \beta \mathbf{A}_1)^{-1} \mathbf{a}_4 + \frac{N}{2} \log \left( \frac{\beta}{2\pi} \right), \end{aligned} \quad (3)$$

where  $\|\cdot\|_F$  is Frobenius norm, and

$$\mathbf{A}_1 = \sum_j k(\mathbf{B}, \mathbf{x}_{i_j}) k(\mathbf{x}_{i_j}, \mathbf{B}), \quad a_2 = \sum_j y_{i_j}^2, \quad a_3 = \sum_j k(\mathbf{x}_{i_j}, \mathbf{x}_{i_j}), \quad \mathbf{a}_4 = \sum_j k(\mathbf{B}, \mathbf{x}_{i_j}) y_{i_j}.$$

## 25 1.2 Binary Tensor

26 Next, let us look at the binary data. The case for binary tensors is more complex, because we have  
 27 the additional variational posterior  $q(\mathbf{z}) = \prod_j q(z_j)$ . Furthermore,  $q(\mathbf{v})$  and  $q(\mathbf{z})$  are coupled in the  
 28 original ELBO (see (2)). To eliminate  $q(\mathbf{v})$  and  $q(\mathbf{z})$ , we use the following steps. We first fix  $q(\mathbf{z})$ ,  
 29 calculate the optimal  $q(\mathbf{v})$  and plug it into  $L_2$  (this is similar to the continuous case) to obtain an  
 30 intermediate bound,

$$\begin{aligned} \hat{L}_2(q(\mathbf{z}), \mathcal{U}, \mathbf{B}) &= \max_{q(\mathbf{v})} L_2(q(\mathbf{v}), q(\mathbf{z}), \mathcal{U}, \mathbf{B}) = \frac{1}{2} \log |\mathbf{K}_{BB}| - \frac{1}{2} \log |\mathbf{K}_{BB} + \mathbf{A}_1| - \frac{1}{2} \sum_j \langle z_j^2 \rangle \\ &- \frac{1}{2} a_3 + \frac{1}{2} \text{tr}(\mathbf{K}_{BB}^{-1} \mathbf{A}_1) - \frac{N}{2} \log(2\pi) + \frac{1}{2} (\mathbf{K}_{BS} \langle \mathbf{z} \rangle)^\top (\mathbf{K}_{BB} + \mathbf{A}_1)^{-1} (\mathbf{K}_{BS} \langle \mathbf{z} \rangle) \\ &+ \sum_j \int q(z_j) \log\left(\frac{p(y_{i_j}|z_j)}{q(z_j)}\right) dz_j - \frac{1}{2} \sum_{k=1}^K \|\mathbf{U}^{(k)}\|_F^2 \end{aligned} \quad (4)$$

31 where  $\langle \cdot \rangle$  denotes the expectation under the variational posteriors. Note that  $\hat{L}_2$  has a similar form to  
 32  $L_1^*$  in (3).

33 Now we consider to calculate the optimal  $q(\mathbf{z})$  for  $\hat{L}_2$ . To this end, we calculate the functional  
 34 derivative of  $\hat{L}_2$  with respect to each  $q(z_j)$ :

$$\frac{\delta \hat{L}_2}{\delta q(z_j)} = \log \frac{p(y_{i_j}|z_j)}{q(z_j)} - 1 - \frac{1}{2} z_j^2 + c_{jj} \langle z_j \rangle z_j + \sum_{t \neq j} c_{tj} \langle z_t \rangle z_j.$$

35 where  $c_{tj} = k(\mathbf{x}_{i_t}, \mathbf{B})(\mathbf{K}_{BB} + \mathbf{A}_1)^{-1} k(\mathbf{B}, \mathbf{x}_{i_j})$  and  $p(y_{i_j}|z_j) = \mathbb{1}((2y_{i_j} - 1)z_j \geq 0)$ .

36 Solving  $\frac{\delta \hat{L}_2}{\delta q(z_j)}$  being 0 with Lagrange multipliers, we find that the optimal  $q(z_j)$  is a truncated  
 37 Gaussian,

$$q^*(z_j) \propto \mathcal{N}(z_j | c_{jj} \langle z_j \rangle + \sum_{t \neq j} c_{tj} \langle z_t \rangle, 1) \mathbb{1}((2y_{i_j} - 1)z_j \geq 0).$$

38 This expression is unfortunately not analytical. Even if we can explicitly update each  $q(z_j)$ , the  
 39 updating will depend on all the other variational posteriors  $\{q(z_t)\}_{t \neq j}$ , making distributed calculation  
 40 very difficult. This arises from the quadratic term  $\frac{1}{2} (\mathbf{K}_{BS} \langle \mathbf{z} \rangle)^\top (\mathbf{K}_{BB} + \mathbf{A}_1)^{-1} (\mathbf{K}_{BS} \langle \mathbf{z} \rangle)$  in (4),  
 41 which couples all  $\{\langle z_j \rangle\}_j$ .

42 To resolve this issue, we introduce an extra variational parameter  $\boldsymbol{\lambda}$  to decouple the dependencies  
 43 between  $\{\langle z_j \rangle\}_j$  using the following lemma.

44 **Lemma 1.1.** *For any symmetric positive definite matrix  $\mathbf{E}$ ,*

$$\boldsymbol{\eta}^\top \mathbf{E}^{-1} \boldsymbol{\eta} \geq 2\boldsymbol{\lambda}^\top \boldsymbol{\eta} - \boldsymbol{\lambda}^\top \mathbf{E} \boldsymbol{\lambda}. \quad (5)$$

45 *The equality is achieved when  $\boldsymbol{\lambda} = \mathbf{E}^{-1} \boldsymbol{\eta}$ .*

46 *Proof.* Define the function  $f(\boldsymbol{\eta}) = \boldsymbol{\eta}^\top \mathbf{E}^{-1} \boldsymbol{\eta}$  and it is easy to see that  $f(\boldsymbol{\eta})$  is convex because  
 47  $\mathbf{E}^{-1} \succ 0$ . Then using the convex conjugate, we have  $f(\boldsymbol{\eta}) \geq \boldsymbol{\lambda}^\top \boldsymbol{\eta} - g(\boldsymbol{\lambda})$  and  $g(\boldsymbol{\lambda}) \geq \boldsymbol{\eta}^\top \boldsymbol{\lambda} - f(\boldsymbol{\eta})$ .  
 48 Then by maximizing  $\boldsymbol{\eta}^\top \boldsymbol{\lambda} - f(\boldsymbol{\eta})$ , we can obtain  $g(\boldsymbol{\lambda}) = \frac{1}{4} \boldsymbol{\lambda}^\top \mathbf{E} \boldsymbol{\lambda}$ . Thus,  $f(\boldsymbol{\eta}) \geq \boldsymbol{\lambda}^\top \boldsymbol{\eta} - \frac{1}{4} \boldsymbol{\lambda}^\top \mathbf{E} \boldsymbol{\lambda}$ .  
 49 Since  $\boldsymbol{\lambda}$  is a free parameter, we can use  $2\boldsymbol{\lambda}$  to replace  $\boldsymbol{\lambda}$  and obtain the inequality (5). Further, we can  
 50 verify that when  $\boldsymbol{\lambda} = \mathbf{E}^{-1} \boldsymbol{\eta}$  the equality is achieved.  $\square$

51 We now apply the inequality on the term  $\frac{1}{2} (\mathbf{K}_{BS} \langle \mathbf{z} \rangle)^\top (\mathbf{K}_{BB} + \mathbf{A}_1)^{-1} \mathbf{K}_{BS} \langle \mathbf{z} \rangle$  in (4). Note that the  
 52 quadratic term regarding all  $\{z_j\}$  now vanishes, and instead a linear term  $\boldsymbol{\lambda}^\top \mathbf{K}_{BS} \langle \mathbf{z} \rangle$  is introduced  
 53 so that these annoying dependencies between  $\{z_j\}_j$  are eliminated. We therefore obtain a more

54 friendly intermediate ELBO,

$$\begin{aligned}\tilde{L}_2(\mathcal{U}, \mathbf{B}, q(\mathbf{z}), \boldsymbol{\lambda}) &= \frac{1}{2} \log |\mathbf{K}_{BB}| - \frac{1}{2} \log |\mathbf{K}_{BB} + \mathbf{A}_1| - \frac{1}{2} \sum_j \langle z_j^2 \rangle - \frac{1}{2} a_3 + \frac{1}{2} \text{tr}(\mathbf{K}_{BB}^{-1} \mathbf{A}_1) \\ &- \frac{N}{2} \log(2\pi) + \sum_j \boldsymbol{\lambda}^\top k(\mathbf{B}, \mathbf{x}_{i_j}) \langle z_j \rangle - \frac{1}{2} \boldsymbol{\lambda}^\top (\mathbf{K}_{BB} + \mathbf{A}_1) \boldsymbol{\lambda} + \sum_j \int q(z_j) \log\left(\frac{p(y_{i_j}|z_j)}{q(z_j)}\right) dz_j \\ &- \frac{1}{2} \sum_{k=1}^K \|\mathbf{U}^{(k)}\|_F^2.\end{aligned}\quad (6)$$

55 The functional derivative with respect to  $q(z_j)$  is then given by

$$\frac{\delta \tilde{L}_2}{\delta q(z_j)} = \log \frac{p(y_{i_j}|z_j)}{q(z_j)} - 1 - \frac{1}{2} z_j^2 + \boldsymbol{\lambda}^\top k(\mathbf{B}, \mathbf{x}_{i_j}) z_j.$$

56 Now solving  $\frac{\delta \tilde{L}_2}{\delta q(z_j)} = 0$ , we see that the optimal variational posterior has an analytical form:

$$q^*(z_j) \propto \mathcal{N}(z_j | \boldsymbol{\lambda}^\top k(\mathbf{B}, \mathbf{x}_{i_j}), 1) \mathbb{I}((2y_{i_j} - 1)z_j \geq 0).$$

57 Plugging each  $q^*(z_j)$  into (6), we finally obtain the tight ELBO as presented in **Theorem 4.2** of the  
58 main paper:

$$\begin{aligned}\log(p(\mathbf{y}, \mathcal{U} | \mathbf{B})) &\geq L_2^*(\mathcal{U}, \mathbf{B}, \boldsymbol{\lambda}) = \frac{1}{2} \log |\mathbf{K}_{BB}| - \frac{1}{2} \log |\mathbf{K}_{BB} + \mathbf{A}_1| - \frac{1}{2} a_3 \\ &+ \sum_j \log(\Phi((2y_{i_j} - 1) \boldsymbol{\lambda}^\top k(\mathbf{B}, \mathbf{x}_{i_j}))) - \frac{1}{2} \boldsymbol{\lambda}^\top \mathbf{K}_{BB} \boldsymbol{\lambda} + \frac{1}{2} \text{tr}(\mathbf{K}_{BB}^{-1} \mathbf{A}_1) - \frac{1}{2} \sum_{k=1}^K \|\mathbf{U}^{(k)}\|_F^2.\end{aligned}\quad (7)$$

## 59 2 Gradients of the Tight ELBO

60 In this section, we present how to calculate the gradients of the tight ELBOs in (3) and (7) with  
61 respect to the latent factors  $\mathcal{U}$ , the inducing points  $\mathbf{B}$  and the kernel parameters.

62 Let us first consider the tight ELBO for continuous data. Because  $\mathcal{U}$ ,  $\mathbf{B}$  and the kernel parameters are  
63 all inside the terms involving the kernel functions, such as  $\mathbf{K}_{BB}$  and  $\mathbf{A}_1$ , we calculate the gradients  
64 with respect to these terms first and then use the chain rule to calculate the gradients with respect to  
65  $\mathcal{U}$  and  $\mathbf{B}$  and the kernel parameters. Specifically, we consider the derivatives with respect to  $\mathbf{K}_{BB}$ ,  
66  $\mathbf{A}_1$ ,  $a_3$  and  $\mathbf{a}_4$ . Using matrix derivatives and algebras (Minka, 2000), we obtain

$$\begin{aligned}dL_1^* &= \frac{1}{2} \text{tr}((\mathbf{K}_{BB}^{-1} - (\mathbf{K}_{BB} + \beta \mathbf{A}_1)^{-1}) d\mathbf{K}_{BB}) - \frac{\beta}{2} \text{tr}((\mathbf{K}_{BB} + \beta \mathbf{A}_1)^{-1} d\mathbf{A}_1) \\ &- \frac{\beta}{2} da_3 - \frac{\beta}{2} \text{tr}(\mathbf{K}_{BB}^{-1} \mathbf{A}_1 \mathbf{K}_{BB}^{-1} d\mathbf{K}_{BB}) + \beta^2 \text{tr}(\mathbf{a}_4^\top (\mathbf{K}_{BB} + \beta \mathbf{A}_1)^{-1} d\mathbf{a}_4) \\ &+ \frac{\beta}{2} \text{tr}(\mathbf{K}_{BB}^{-1} d\mathbf{A}_1) - \frac{1}{2} \beta^2 \text{tr}((\mathbf{K}_{BB} + \beta \mathbf{A}_1)^{-1} \mathbf{a}_4 \mathbf{a}_4^\top (\mathbf{K}_{BB} + \beta \mathbf{A}_1)^{-1} d\mathbf{K}_{BB}) \\ &- \frac{1}{2} \beta^3 \text{tr}((\mathbf{K}_{BB} + \beta \mathbf{A}_1)^{-1} \mathbf{a}_4 \mathbf{a}_4^\top (\mathbf{K}_{BB} + \beta \mathbf{A}_1)^{-1} d\mathbf{A}_1).\end{aligned}\quad (8)$$

67 Next, we calculate the derivatives  $d\mathbf{K}_{BB}$ ,  $d\mathbf{A}_1$ ,  $da_3$  and  $d\mathbf{a}_4$ , which depend on the specific kernel  
68 function form used in the model. For example, if we use the linear kernel,  $d\mathbf{K}_{BB} = 2\mathbf{B}^\top d\mathbf{B}$   
69 and  $d\mathbf{A}_1 = \sum_{j=1}^N k(\mathbf{B}, \mathbf{x}_{i_j}) (\mathbf{x}_{i_j} d\mathbf{B}^\top + d\mathbf{x}_{i_j} \mathbf{B}^\top) + (d\mathbf{B} \mathbf{x}_{i_j}^\top + \mathbf{B} d\mathbf{x}_{i_j}^\top) k(\mathbf{x}_{i_j}, \mathbf{B})$  where  $\mathbf{x}_{i_j} =$   
70  $[\mathbf{u}_{i_{j1}}^{(1)}, \dots, \mathbf{u}_{i_{jK}}^{(K)}]$ . Note that because  $\mathbf{A}_1$ ,  $a_3$  and  $\mathbf{a}_4$  all have additive structures which involve  
71 individual tensor entry  $\mathbf{i}_j$  ( $1 \leq j \leq N$ ) and the major computation of the derivatives in (8) also  
72 involve similar summations, the computation of the final gradients with respect to  $\mathcal{U}$  and  $\mathbf{B}$  and the  
73 kernel parameters can easily be performed in parallel.

74 The gradient calculation for the tight ELBOs for binary tensors is very similar to the continuous case.  
 75 Specifically, we obtain

$$\begin{aligned} dL_2^* = & \frac{1}{2}\text{tr}(\mathbf{K}_{BB}^{-1} - (\mathbf{K}_{BB} + \mathbf{A}_1)^{-1}d\mathbf{K}_{BB}) - \frac{1}{2}\text{tr}((\mathbf{K}_{BB} + \mathbf{A}_1)^{-1}d\mathbf{A}_1) \\ & - \frac{1}{2}da_3 - \frac{1}{2}\text{tr}(\mathbf{K}_{BB}^{-1}\mathbf{A}_1\mathbf{K}_{BB}^{-1}d\mathbf{K}_{BB}) + \frac{1}{2}\text{tr}(\mathbf{K}_{BB}^{-1}d\mathbf{A}_1) - \frac{1}{2}\text{tr}(\boldsymbol{\lambda}\boldsymbol{\lambda}^\top d\mathbf{K}_{BB}) \\ & + \sum_{j=1}^N (2y_{i_j} - 1) \frac{\mathcal{N}(\boldsymbol{\lambda}^\top k(\mathbf{B}, \mathbf{x}_{i_j})|0, 1)}{\Phi((2y_{i_j} - 1)\boldsymbol{\lambda}^\top k(\mathbf{B}, \mathbf{x}_{i_j}))} \boldsymbol{\lambda}^\top dk(\mathbf{B}, \mathbf{x}_{i_j}). \end{aligned} \quad (9)$$

76 We can then calculate the derivatives  $d\mathbf{K}_{BB}$ ,  $d\mathbf{A}_1$ ,  $da_3$  and each  $dk(\mathbf{B}, \mathbf{x}_{i_j})$  ( $1 \leq j \leq N$ ) and then  
 77 apply the chain rule to calculate the gradient with respect to  $\mathcal{U}$ ,  $\mathbf{B}$  and the kernel parameters.

### 78 3 Fixed Point Iteration for $\boldsymbol{\lambda}$

79 In this section, we give the convergence proof of the fixed point iteration of the variational parameters  
 80  $\boldsymbol{\lambda}$  in the tight ELBO for binary tensors. While  $\boldsymbol{\lambda}$  can be jointly optimized via gradient based  
 81 approaches with  $\mathcal{U}$ ,  $\mathbf{B}$  and the kernel parameters, we empirically find that combining this fixed point  
 82 iteration can converge much faster. The fixed point iteration is given by

$$\boldsymbol{\lambda}^{(t+1)} = (\mathbf{K}_{BB} + \mathbf{A}_1)^{-1}(\mathbf{A}_1\boldsymbol{\lambda}^{(t)} + \mathbf{a}_5) \quad (10)$$

83 where

$$\mathbf{A}_1 = \sum_j k(\mathbf{B}, \mathbf{x}_{i_j})k(\mathbf{x}_{i_j}, \mathbf{B}), \quad \mathbf{a}_5 = \sum_j k(\mathbf{B}, \mathbf{x}_{i_j})(2y_{i_j} - 1) \frac{\mathcal{N}(k(\mathbf{B}, \mathbf{x}_{i_j})^\top \boldsymbol{\lambda}^{(t)}|0, 1)}{\Phi((2y_{i_j} - 1)k(\mathbf{B}, \mathbf{x}_{i_j})^\top \boldsymbol{\lambda}^{(t)})}.$$

84 We now show that the fixed point iteration not only always converges, but also improves the ELBO in  
 85 (7) after every update of  $\boldsymbol{\lambda}$  (see **Lemma 4.3** in the main paper).

86 Specifically, given  $\mathcal{U}$  and  $\mathbf{B}$ , from Section 1 we have

$$L_2^*(\boldsymbol{\lambda}^{(t)}) = \max_{q(\mathbf{z})} \tilde{L}_2(\boldsymbol{\lambda}^{(t)}, q(\mathbf{z})) = \tilde{L}_2(\boldsymbol{\lambda}^{(t)}, q_{\boldsymbol{\lambda}^{(t)}}(\mathbf{z}))$$

87 where  $q_{\boldsymbol{\lambda}^{(t)}}(\mathbf{z})$  is the optimal variational posterior:  $q_{\boldsymbol{\lambda}^{(t)}}(\mathbf{z}) = \prod_j q_{\boldsymbol{\lambda}^{(t)}}(z_j)$  and  $q_{\boldsymbol{\lambda}^{(t)}}(z_j) \propto$   
 88  $\mathcal{N}(z_j|k(\mathbf{B}, \mathbf{x}_{i_j})^\top \boldsymbol{\lambda}^{(t)}, 1)\mathbb{1}((2y_{i_j} - 1)z_j \geq 0)$ .

89 Now let us fix  $q_{\boldsymbol{\lambda}^{(t)}}(\mathbf{z})$  and derive the optimal  $\boldsymbol{\lambda}$  by solving  $\frac{\partial \tilde{L}_2}{\partial \boldsymbol{\lambda}} = 0$ . We then obtain the update  
 90 of  $\boldsymbol{\lambda}$ :  $\boldsymbol{\lambda}^{(t+1)} = (\mathbf{K}_{BB} + \mathbf{A}_1)^{-1}(\sum_j k(\mathbf{B}, \mathbf{x}_{i_j})\langle z_j \rangle)$  where  $\langle z_j \rangle$  is the expectation of the optimal  
 91 variational posterior of  $z_j$  given  $\boldsymbol{\lambda}^{(t)}$ , i.e.,  $q_{\boldsymbol{\lambda}^{(t)}}(z_j)$ . Obviously, we have

$$\tilde{L}_2(\boldsymbol{\lambda}^{(t)}, q_{\boldsymbol{\lambda}^{(t)}}(\mathbf{z})) \leq \tilde{L}_2(\boldsymbol{\lambda}^{(t+1)}, q_{\boldsymbol{\lambda}^{(t)}}(\mathbf{z})).$$

92 Further, because  $L_2^*(\boldsymbol{\lambda}^{(t)}) = \tilde{L}_2(\boldsymbol{\lambda}^{(t)}, q_{\boldsymbol{\lambda}^{(t)}}(\mathbf{z}))$  and

$$\tilde{L}_2(\boldsymbol{\lambda}^{(t+1)}, q_{\boldsymbol{\lambda}^{(t)}}(\mathbf{z})) \leq \tilde{L}_2(\boldsymbol{\lambda}^{(t+1)}, q_{\boldsymbol{\lambda}^{(t+1)}}(\mathbf{z})) = L_2^*(\boldsymbol{\lambda}^{(t+1)})$$

93 we conclude that  $L_2^*(\boldsymbol{\lambda}^{(t)}) \leq L_2^*(\boldsymbol{\lambda}^{(t+1)})$ . Now, we plug the fact that  $\langle z_j \rangle = w_j^{(t)} + k(\mathbf{B}, \mathbf{x}_{i_j})^\top \boldsymbol{\lambda}^{(t)}$   
 94 given  $q_{\boldsymbol{\lambda}^{(t)}}(z_j)$  into the calculation of  $\boldsymbol{\lambda}^{(t+1)}$ , merge and arrange the terms. We then obtain the fixed  
 95 point iteration for  $\boldsymbol{\lambda}$  in (10). Finally since  $L_2^*$  is upper bounded by the log model evidence, the fixed  
 96 point iteration always converges.

### 97 4 Application on Click-Through-Rate Prediction

98 In this section, we report the results of applying our nonlinear tensor factorization approach on  
 99 Click-Through-Rate (CTR) prediction for online advertising.

100 We used the online ads click log from a major Internet company, from which we extracted a four mode  
 101 tensor (*user, advertisement, publisher, page-section*). We used the first three days's log on May 2015,

102 trained our model on one day's data and used it to predict the click behaviour on the next day. The  
 103 sizes of the extracted tensors for the three days are  $179K \times 81K \times 35 \times 355$ ,  $167K \times 78K \times 35 \times 354$   
 104 and  $213K \times 82K \times 37 \times 354$  respectively. These tensors are very sparse ( $2.7 \times 10^{-8}\%$  nonzeros on  
 105 average); in other words, the observed clicks are very rare. However, we do not want our prediction  
 106 completely bias toward zero (i.e., non-click); otherwise, ads ranking and recommendation will be  
 107 infeasible. Thus we sampled non-clicks of the same quantity as the clicks for training and testing.  
 108 Note that training CTR prediction models with comparable clicks and non-click samples is common  
 109 in online advertising systems (Agarwal et al., 2014). The number of training and testing entries used  
 110 for the three days are  $(109K, 99K)$ ,  $(91K, 103K)$  and  $(109K, 136K)$  respectively.

111 We compared with popular methods for CTR prediction, including logistic regression and linear  
 112 SVM, where each tensor entry is represented by a set of binary features according to the indices of  
 113 each mode in the entry. We used the distributed implementations in spark MLlib.

114 The results are reported in Table 1, in terms of AUC. It shows that our model improves logistic  
 115 regression and linear SVM by a large margin, on average 20.7% and 20.8% respectively. Therefore,  
 116 although we have not incorporated side features, such as user profiles and advertisement attributes,  
 our tentative experiments have shown a promising potential of our model on CTR prediction task.

Table 1: CTR prediction accuracy on the first three days of May 2015. "1-2" means using May 1st's data for training and May 2nd's data for testing; similar are "2-3" and "3-4".

| Method              | 1-2           | 2-3           | 3-4           |
|---------------------|---------------|---------------|---------------|
| Logistic regression | 0.7360        | 0.7337        | 0.7538        |
| Linear SVM          | 0.7414        | 0.7332        | 0.7540        |
| Our model           | <b>0.8925</b> | <b>0.8903</b> | <b>0.9054</b> |

117

## 118 References

- 119 Agarwal, D., Long, B., Traupman, J., Xin, D., and Zhang, L. (2014). Laser: A scalable response  
 120 prediction platform for online advertising. In *Proceedings of the 7th ACM international conference*  
 121 *on Web search and data mining*, pages 173–182. ACM.
- 122 Bishop, C. M. (2006). *Pattern recognition and machine learning*. springer.
- 123 Minka, T. P. (2000). Old and new matrix algebra useful for statistics. See [www.stat.cmu.edu/minka/papers/matrix.html](http://www.stat.cmu.edu/minka/papers/matrix.html).  
 124
